# Supplementary material for: A novel light-harvesting ZIF-9-TCPP as a promising FRET-based ratiometric fluorescence probe for sperm mobility
Source: Royal Society of Chemistry journal article supplement (doi:10.1039/d4an01305k), 2024-01-01
Supplement: d4an01305k1.pdf [file d4an01305k1.pdf]

*Supplementary material*

**A Novel Light-Harvesting ZIF-9-TCPP as a Promising FRET-based Radiometric Fluorescence Probe for Sperm Mobility**

Yi-Xuan Li<sup>a, b</sup>, Yu-Xuan Dai<sup>a, b</sup>, Ju-Zheng Wang<sup>a</sup>, Jérôme Chauvin<sup>c</sup>, Xue-Ji Zhang<sup>d</sup>, Serge Cosnier<sup>c, e, f</sup>, Robert S Marks<sup>g</sup>, Dan Shan<sup>a\*</sup>

*<sup>a</sup> School of Environmental and Biological Engineering, Nanjing University of Science and Technology, Nanjing 210094, P R China*

*<sup>b</sup> College of Chemical and Material Engineering, Quzhou University, Quzhou, Zhejiang 324000, P R China*

*<sup>c</sup> University of Grenoble Alpes-CNRS, DCM UMR 5250, F-38000 Grenoble, France*

*<sup>d</sup> School of Biomedical Engineering, Health Science Centre, Shenzhen University, Shenzhen 518060, P R China*

*<sup>e</sup> Centre for Organic and Nanohybrid Electronics, Silesian University of Technology, Konarskiego 22B, 44-100 Gliwice, Poland*

*<sup>f</sup> Department of Physical Chemistry and Technology of Polymers, Silesian University of Technology, M. Strzody 9, 44-100 Gliwice, Poland*

*<sup>g</sup> Department of Biotechnology Engineering, Ben-Gurion University of the Negev, Beer-Sheva, 90089, Israel*

\* Corresponding author:

Email: [danshan@njust.edu.cn](mailto:danshan@njust.edu.cn) (D. Shan)

Fax: 0086-25-84303107

## Supporting Figures

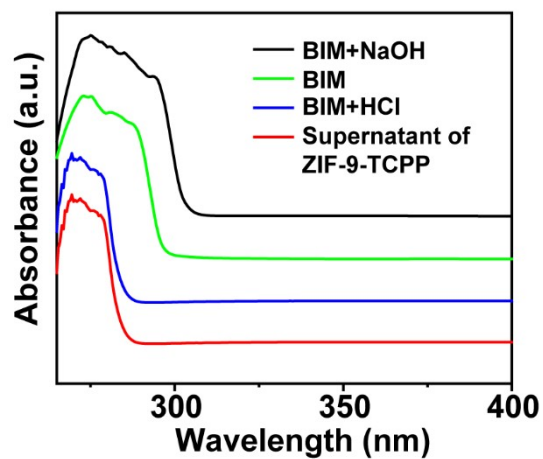

**Figure S1.** UV-vis spectra of supernatant of ZIF-9-TCPP and BIM at different pH.

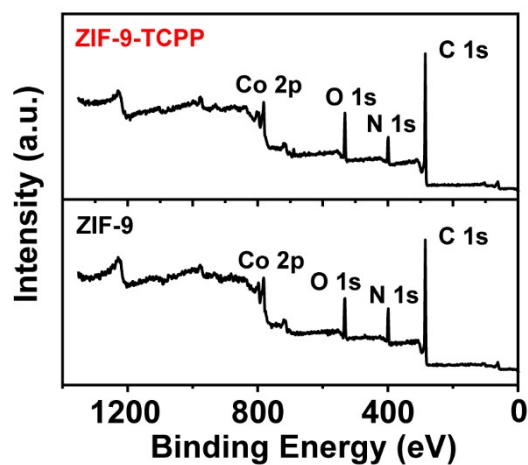

**Figure S2.** Full XPS spectra of ZIF-9 and ZIF-9-TCPP.

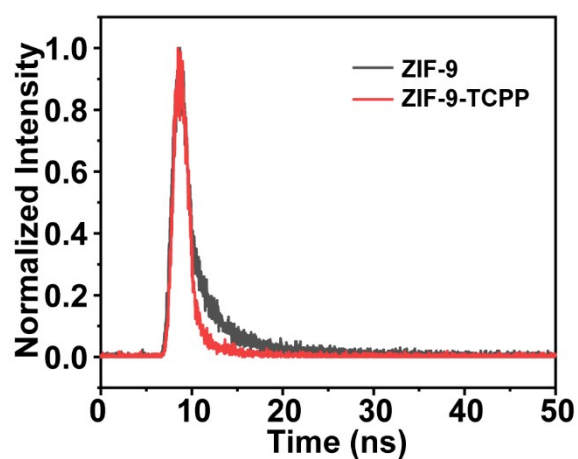

**Figure S3.** Fluorescence decay profiles of ZIF-9 and ZIF-9-TCPP.

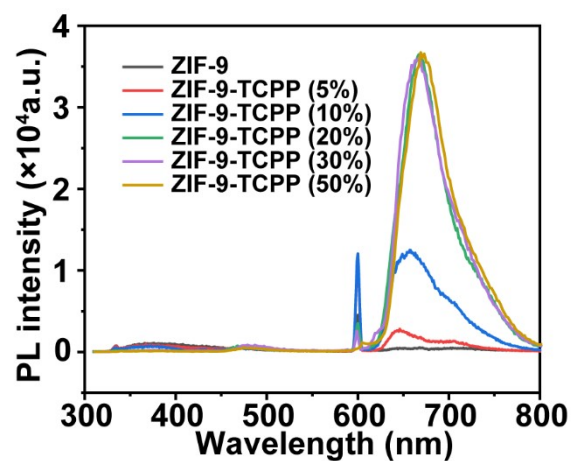

**Figure S4.** Fluorescence spectra of ZIF-9 and ZIF-9-TCPP with different concentration of TCPP.

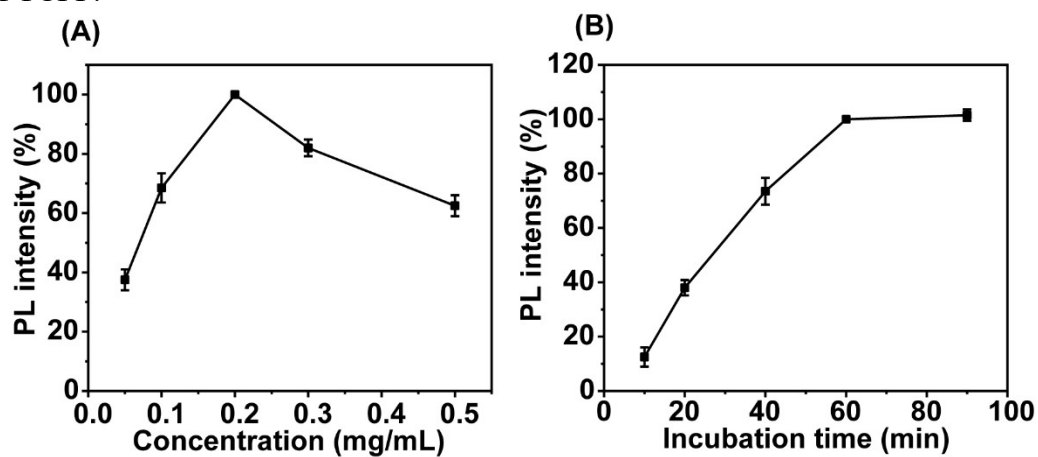

**Figure S5.** (A) PL intensity of different concentration of ZIF-9-TCPP. (B) PL intensity at 610 nm under different incubation time during  $Zn^{2+}$  detection.

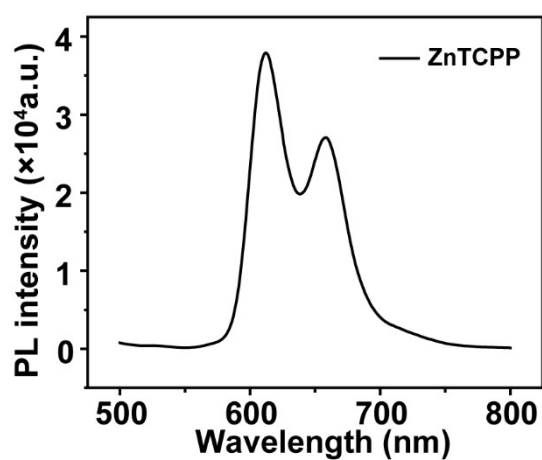

**Figure S6.** Fluorescence spectra of ZnTCPP.

**Table S1.** Comparisons of our methods with previous fluorescence probes for Zn<sup>2+</sup>.

| Materials                       | LOD           | Linear range   | Reference        |
|---------------------------------|---------------|----------------|------------------|
| FHCS                            | 53.7 nM       | 1-10 $\mu$ M   | 1                |
| dicyanoisophorone<br>derivative | 15.3 nM       | 0-25 $\mu$ M   | 2                |
| Tb/Eu(btec)-4                   | 4.2 nM        | 10 nM-1 mM     | 3                |
| PDACQDs-SA                      | 90 nM         | 0-100 $\mu$ M  | 4                |
| H <sub>1</sub>                  | 36 nM         | 0-10 $\mu$ M   | 5                |
| ZIF-9-TCPP                      | <b>0.7 nM</b> | 5 nM-2 $\mu$ M | <b>This work</b> |

## References

1. G. Zhao, G. Wei, Z. Yan, B. Guo, S. Guang, R. Wu, H. Xu, A multiple fluorescein-based turn-on fluorophore (FHCS) identified for simultaneous determination and living imaging of toxic Al<sup>3+</sup> and Zn<sup>2+</sup> by improved Stokes shift. *Anal. Chim. Acta*, 2020, **1095**, 185.
2. L. Yan, H. Yang, J. Li, C. Zhou, L. Li, X. Wu, C. Lei, A near infrared fluorescent probe for detection and bioimaging of zinc ions and hypochlorous acid. *Anal. Chim. Acta*, 2022, **1206**, 339750.
3. H. Sha, B. Yan, Terbium-based metal-organic frameworks through energy transfer modulation for visual logical sensing zinc and fluorine ions. *Talanta*, 2023, **257**, 124326.
4. J. Ni, L. Kong, M. Tang, Y. Song, J. Zhao, W. Wang, T. Sun, Y. Wang, L. Wang, Sensitive visual detection of intracellular zinc ions based on signal-on polydopamine carbon dots. *Nanotechnology*, 2022, **33**, 185502.
5. J. Li, Y. Chen, T. Chen, J. Qiang, Z. Zhang, T. Wei, W. Zhang, F. Wang, X. Chen, A benzothiazole-based fluorescent probe for efficient detection and discrimination of Zn<sup>2+</sup> and Cd<sup>2+</sup>, using cysteine as an auxiliary reagent. *Sensor. Actuat. B-chem.*, 2018, **268**, 446.
